# Supplementary material for: Beneficial effects ofDendrobium officinaleon metabolic hypertensive rats by triggering the enteric-origin SCFA-GPCR43/41 pathway
Source: Royal Society of Chemistry journal article supplement (doi:10.1039/d0fo02890h), 2021-01-01
Supplement: d0fo02890h1.pdf [file d0fo02890h1.pdf]

### Figures notes of the supplementary document

Fig. S1 Effect of DOFP on intestinal pathophysiological changes of the model rats. (A) Representative figures of H&E staining of rat ileum villi ( $\times 200$ ), Bar = 50  $\mu\text{m}$ . The black arrows represent intestinal villus. The red arrows represent goblet cells. The pink arrow represents small intestinal crypts; (B) Representative figures of H&E staining of rat colon ( $\times 40$ ), Bar = 500  $\mu\text{m}$ ; (C) Representative mesenteric venous plexus figures; (D) Representative figures of mesenteric venous leukocyte rolling and adhesion in rats, the black arrows represent the number of rolling and adhesion of leukocytes in mesenteric arteries ( $\downarrow$ ); (E) Representative figures of mesenchymal interstitial mast cell degranulation in rats, the black arrows represent mast cell degranulation in mesenteric interstitium ( $\downarrow$ ); (F) Representative intestinal microcirculation blood flow figures and data statistics. Compared with the normal control group  $\Delta p < 0.05$ ,  $\Delta\Delta p < 0.01$ ; compared with the model control group  $\#p < 0.05$ ,  $\#\#p < 0.01$ ;  $n=10$ . NG: normal control group; MG: ACHSFD model group; DOFP-H: DOFP high-dose group; DOFP-L: DOFP low-dose group.

Fig. S2 Effect of DOFP on Intestinal Tight Junction Barrier of the Model Rats. (A) Representative figures of Occludin immunohistochemical staining of the ileum and colon ( $\times 400$ ), Bar = 50  $\mu\text{m}$ ,  $n=6$ ; (B) Representative figures of Claudin immunohistochemical staining of the ileum and colon ( $\times 400$ ), Bar = 50  $\mu\text{m}$ ,  $n=6$ ; (C) Representative figures of ileum transmission electron microscope ( $\times 20000$ ), Bar = 1  $\mu\text{m}$ ,  $n=3$ ; (D) Representative WB figures of colon Occludin, ZO-1, Claudin and data statistics,  $n=3$ . Compared with the normal control group  $\Delta p < 0.05$ ,  $\Delta\Delta p < 0.01$ ; compared with the model control group  $\#p < 0.05$ ,  $\#\#p < 0.01$ . NG: normal control group; MG: ACHSFD model group; DOFP-H: DOFP high-dose group; DOFP-L: DOFP low-dose group.
