# Supplementary figures and images for: Beneficial effects ofDendrobium officinaleon metabolic hypertensive rats by triggering the enteric-origin SCFA-GPCR43/41 pathway
Source: Royal Society of Chemistry journal article supplement (doi:10.1039/d0fo02890h), 2021-01-01

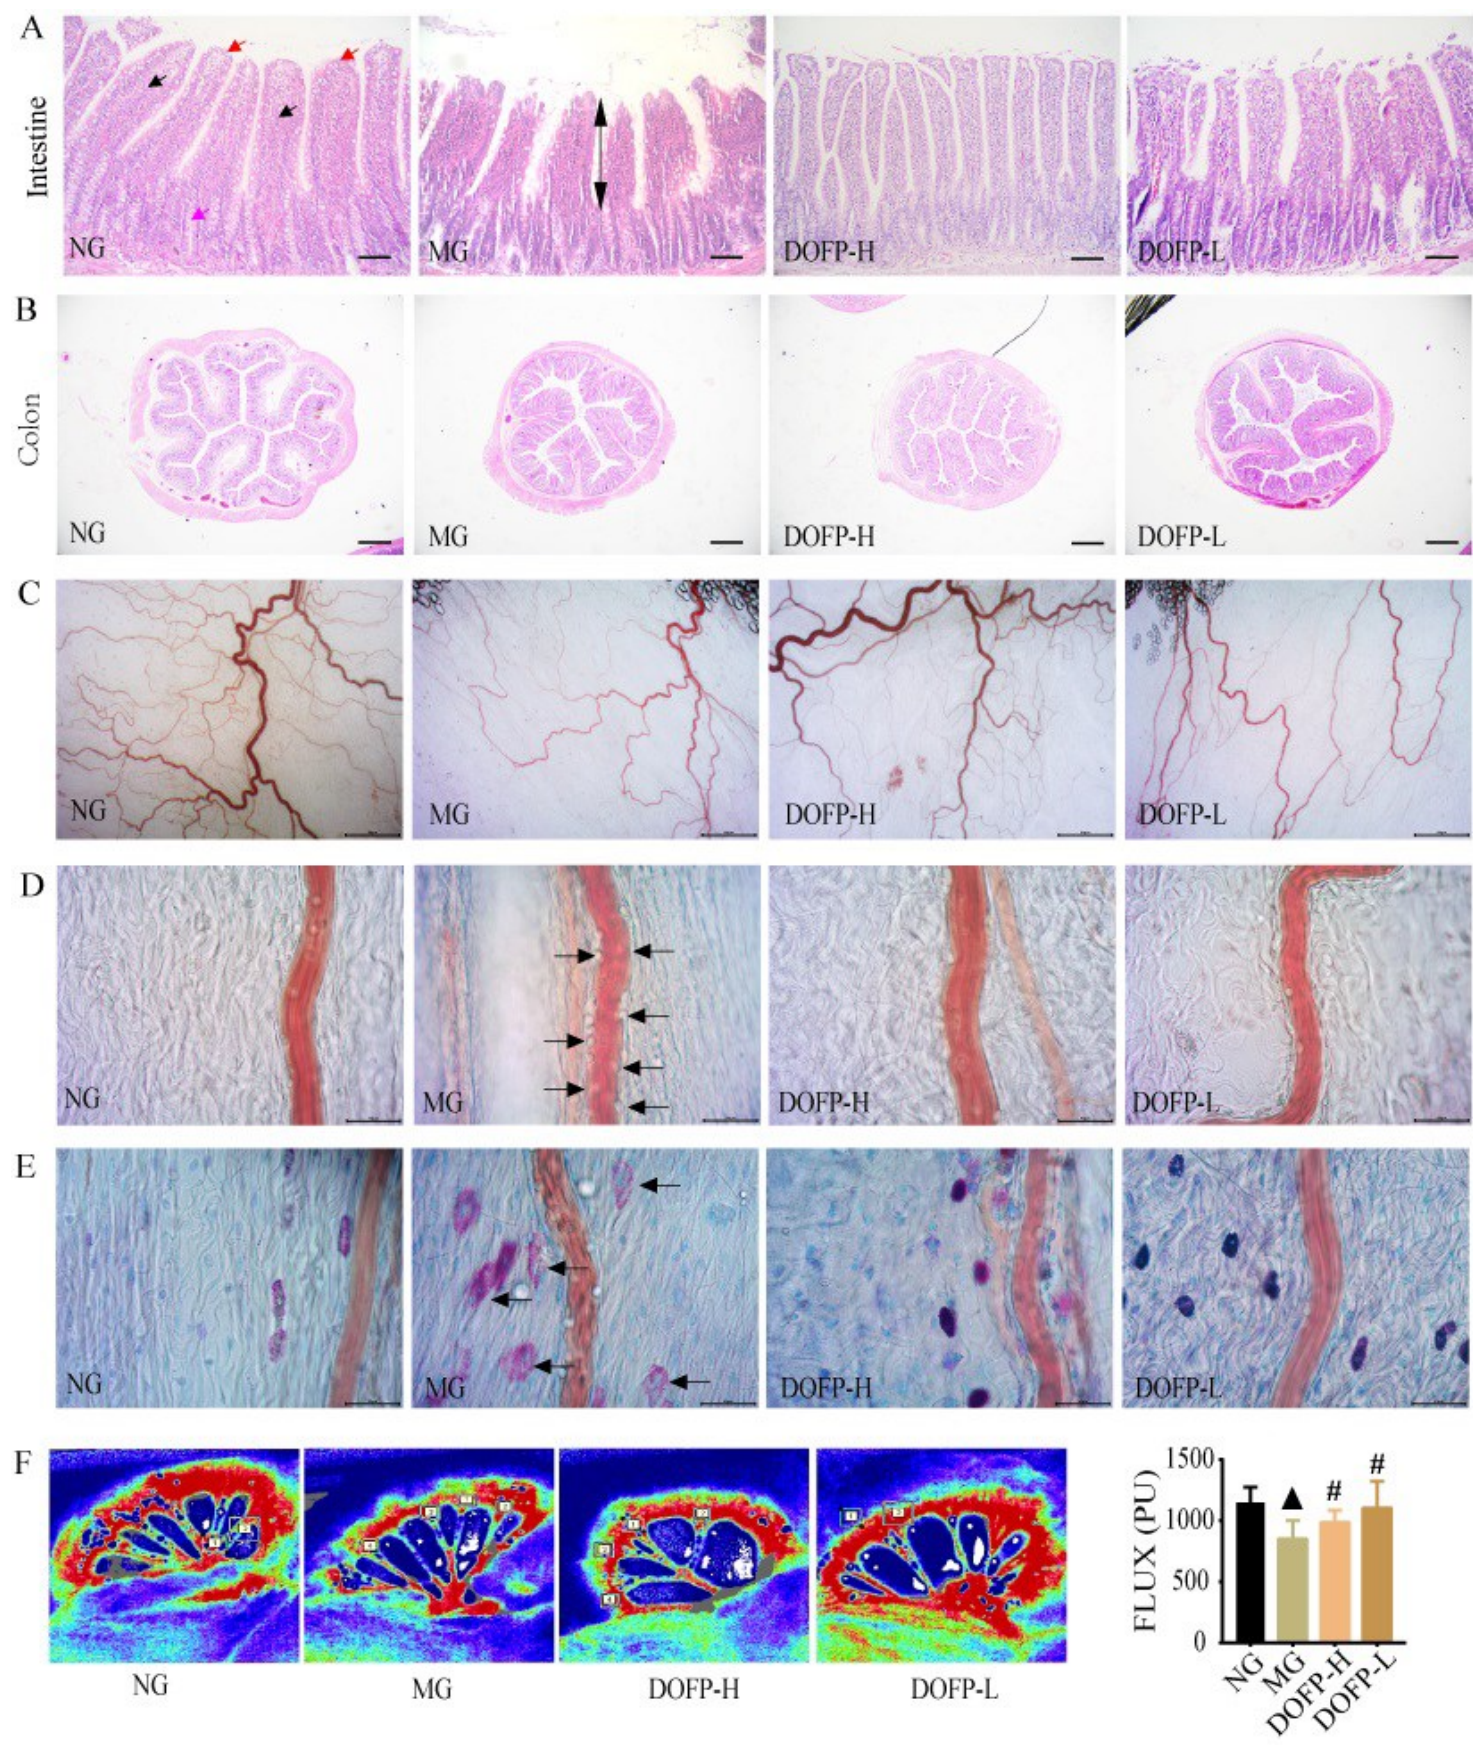

Supplement: d0fo02890h2.pdf [file d0fo02890h2.pdf]

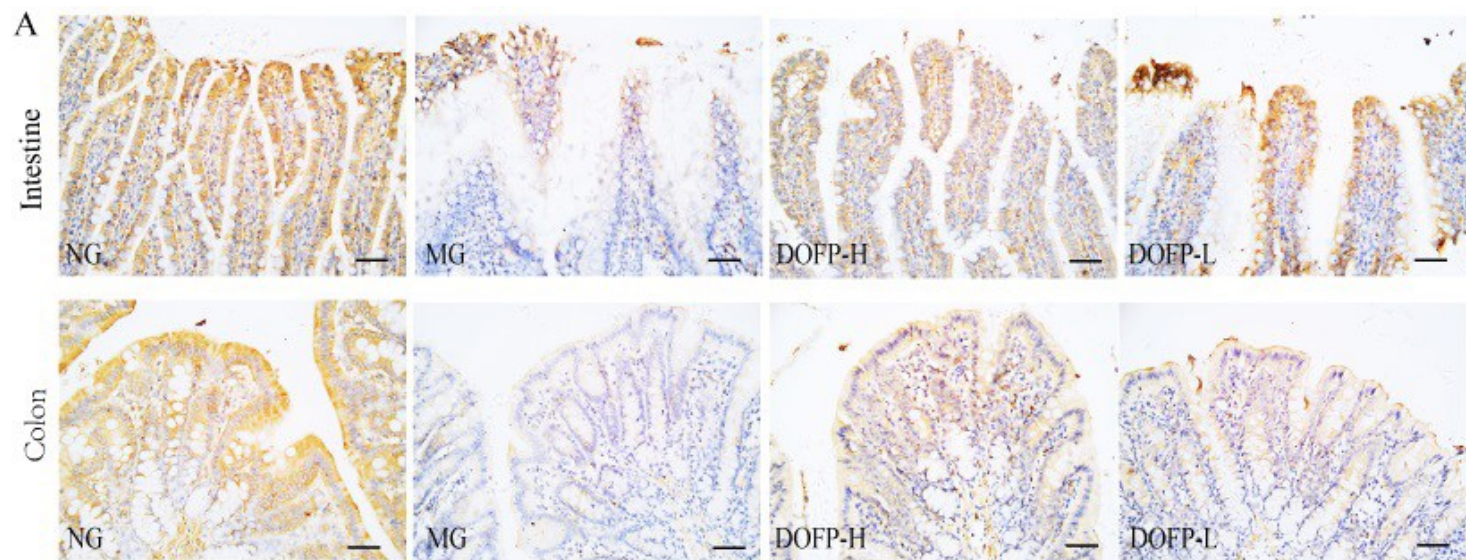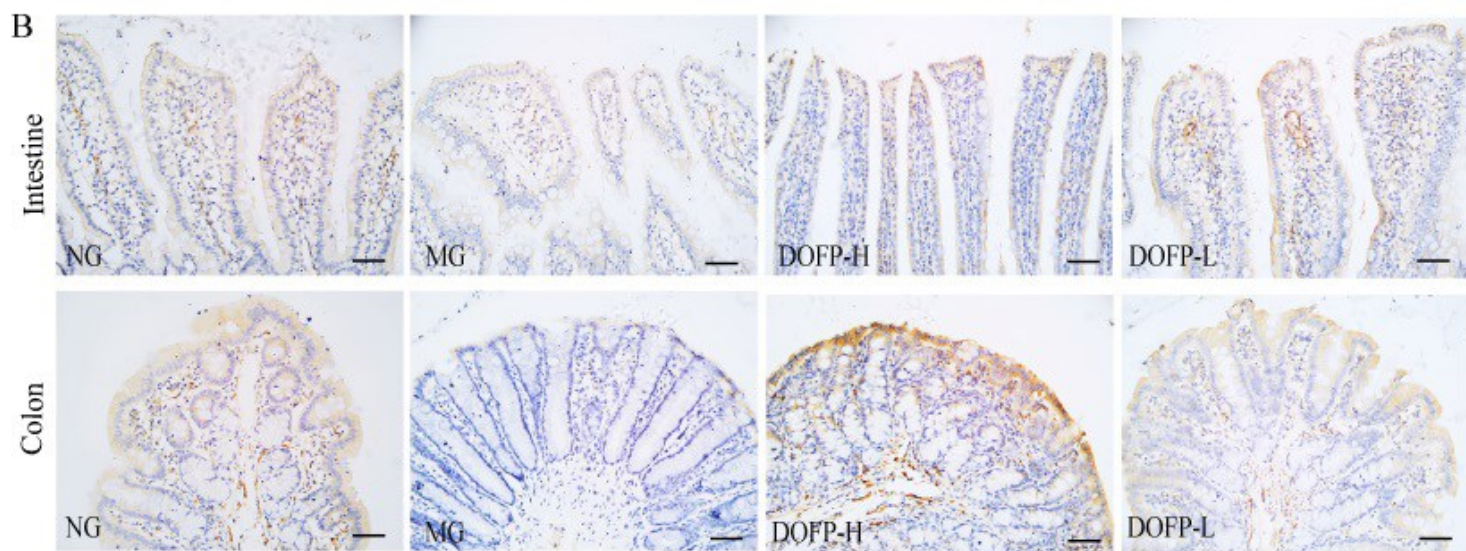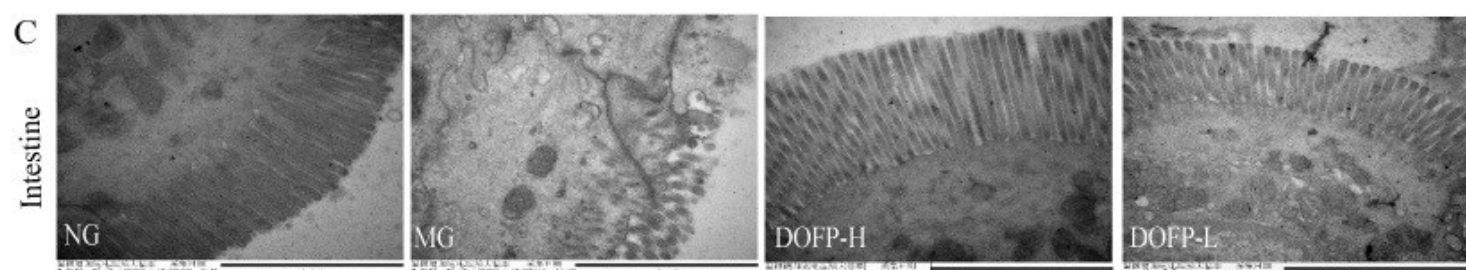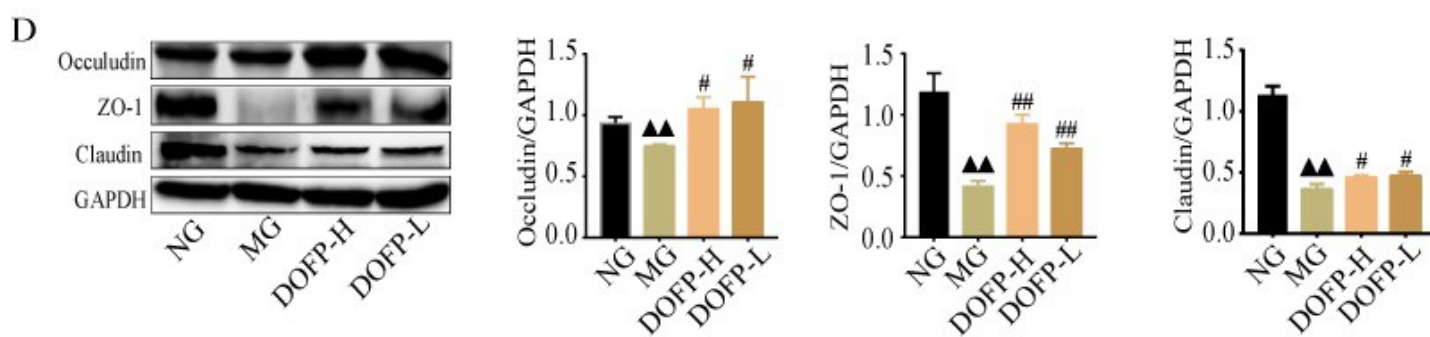

Supplement: d0fo02890h3.pdf [file d0fo02890h3.pdf]
